# Supplementary material
Source: Springer Nature journal article supplement (https://www.springermedizin.de/resource/supplementary/12885_2011_2829_MOESM3_ESM.pdf/9462098)

# Dicer mRNA in primary tumours

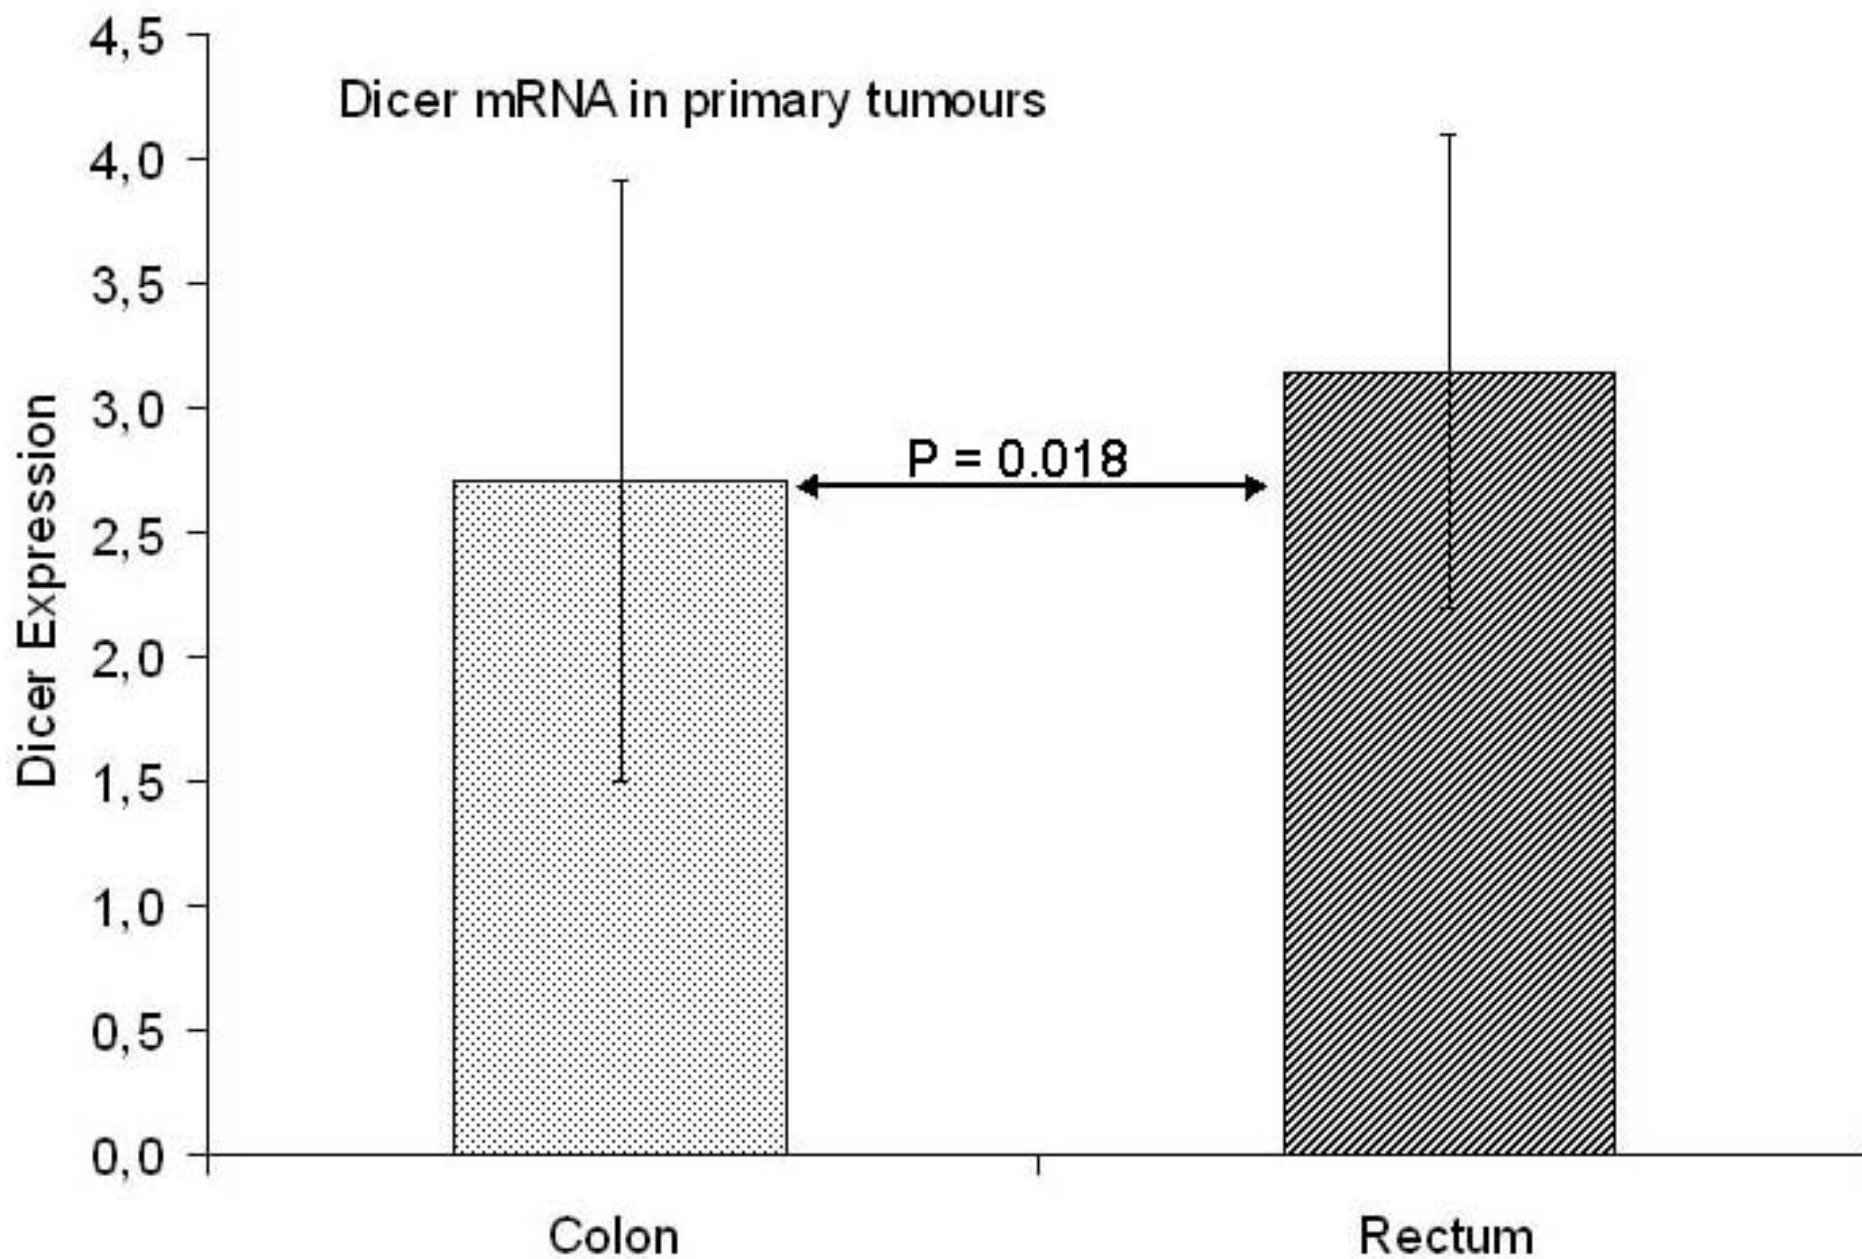

Supplement: MOESM3 [file 9462098]
